# Supplementary material for: The synthesis of 2′-methylseleno adenosine and guanosine 5′-triphosphates
Source: PubMed Central journal article supplement — Bioorg Med Chem. 2012 Apr 1;20(7):2416–8. doi: 10.1016/j.bmc.2012.01.044 (PMC3334826; doi:10.1016/j.bmc.2012.01.044), 2012-04-01

## SUPPORTING INFORMATION TO

### The synthesis of 2'-methylseleno adenosine and guanosine 5'-triphosphates

*Tobias Santner<sup>a</sup>, Vanessa Siegmund<sup>b</sup>, Andreas Marx<sup>b</sup> and Ronald Micura<sup>a,\*</sup>*

*<sup>a</sup>Institute of Organic Chemistry, Center for Molecular Biosciences CMBI, University of Innsbruck, Innrain 52a, 6020 Innsbruck, Austria*

*<sup>b</sup>Department of Chemistry and Konstanz Research School Chemical Biology, University of Konstanz, 78457 Konstanz, Germany*

---

## CONTENTS

### <sup>1</sup>H and <sup>13</sup>C NMR of compounds 2 and 4

|            |   |
|------------|---|
| Compound 2 | 2 |
| Compound 4 | 3 |

## 2'-Methylseleno-2'-deoxyadenosine 5'-triphosphate (2)

$^1\text{H-NMR}$  (500 MHz,  $\text{D}_2\text{O}$ )

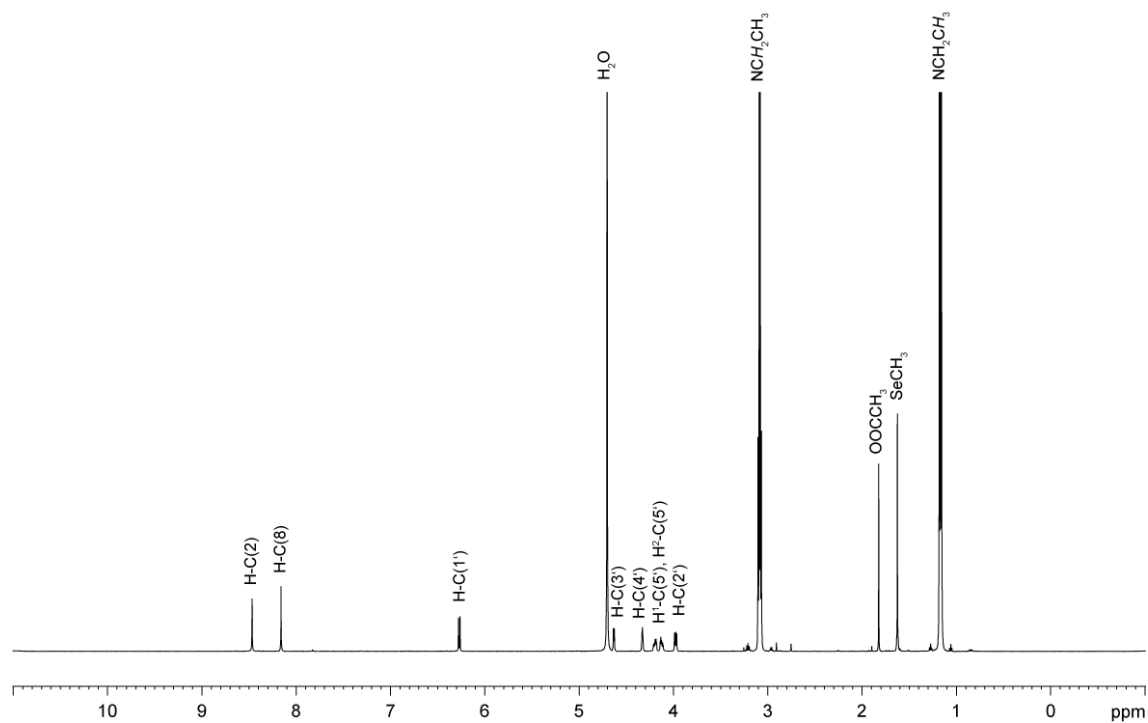

$^{13}\text{C-NMR}$  (150 MHz,  $\text{D}_2\text{O}$ )

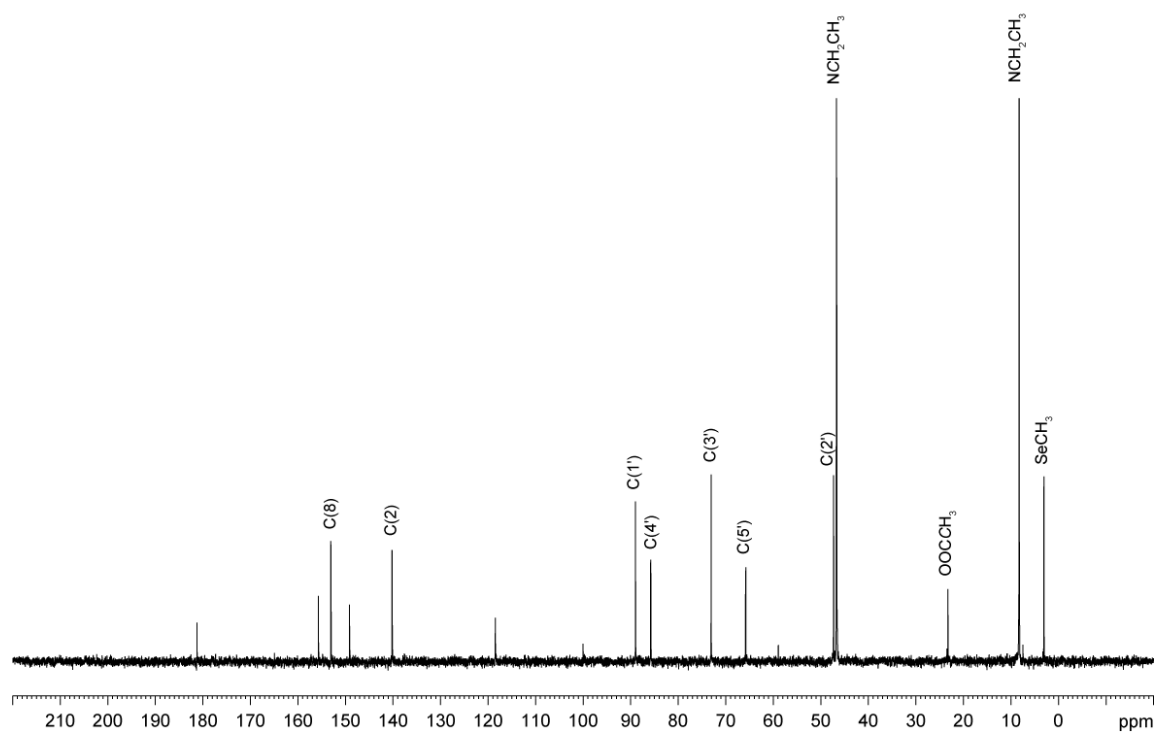

# Synthesis of 2'-methylseleno-2'-deoxyguanosine 5'-triphosphate (4)

$^1\text{H-NMR}$  (500 MHz,  $\text{D}_2\text{O}$ )

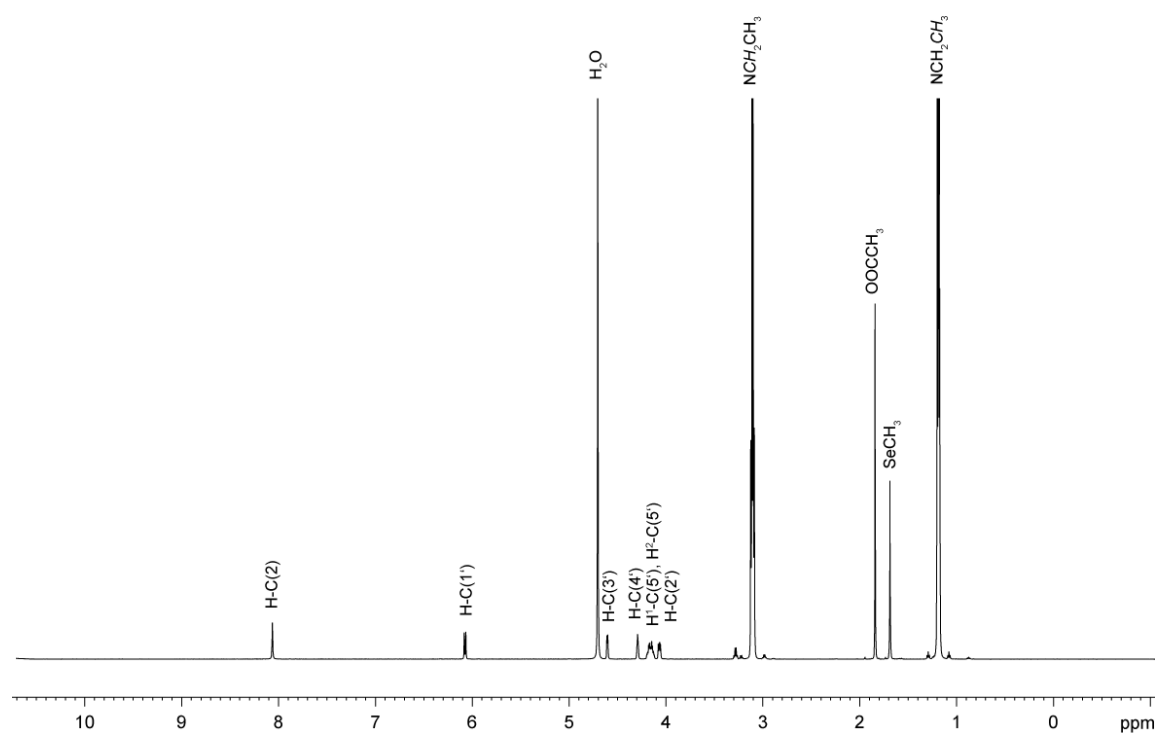

$^{13}\text{C-NMR}$  (150 MHz,  $\text{D}_2\text{O}$ )

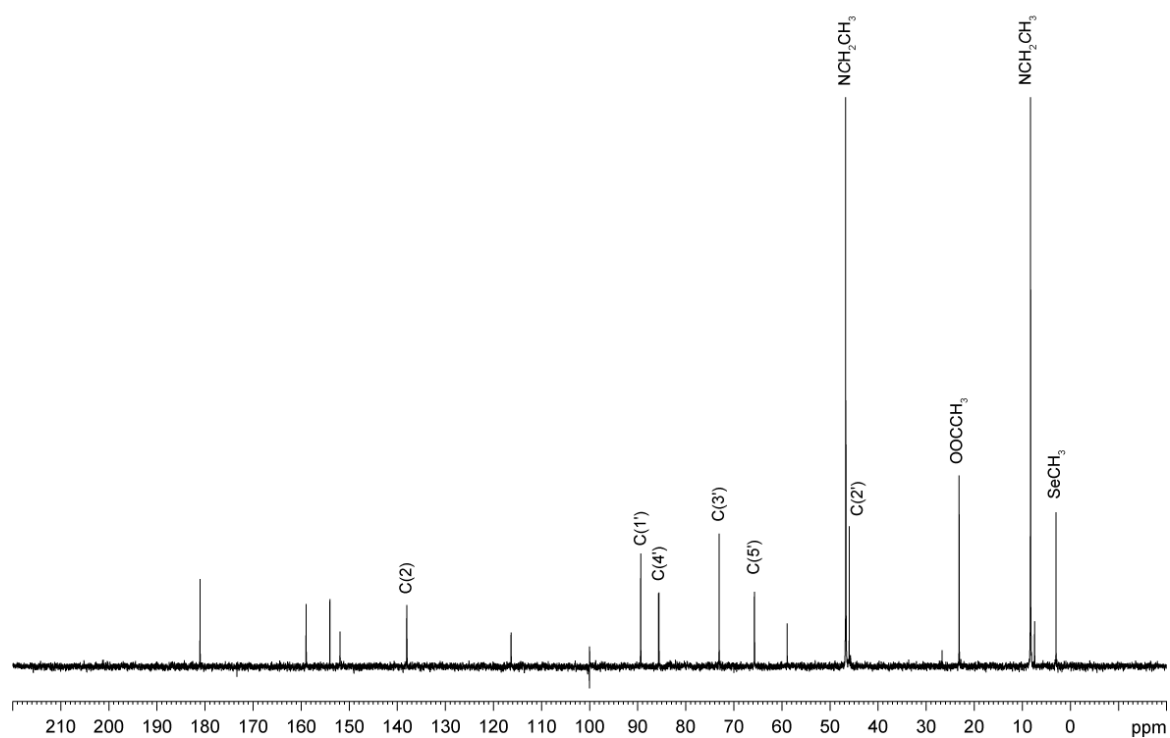

Supplement: mmc1.pdf [file mmc1.pdf]
